# Supplementary material
Source: publisher figshare collection journal article supplement (https://acs.figshare.com/ndownloader/files/4314154)
Supplement: Supplementary file 1 [file 4314154]

Supplementary Table 1A: Comparison of high-confidence peptides for different instrument types in 18 mix datasets

| Dataset     | High<br>Confidence<br>peptides | MassWiz    |        | Mascot     |        | Sequest    |        | OMSSA      |        | X!Tandem   |        |
|-------------|--------------------------------|------------|--------|------------|--------|------------|--------|------------|--------|------------|--------|
|             |                                | Identified | Missed |
| AGILENT XCT | 320                            | 316        | 4      | 307        | 13     | 312        | 8      | 304        | 16     | 246        | 74     |
| LCQ_Deca    | 345                            | 342        | 3      | 335        | 10     | 316        | 29     | 337        | 8      | 260        | 85     |
| LTQ         | 437                            | 430        | 7      | 431        | 6      | 337        | 100    | 433        | 4      | 311        | 126    |
| LTQ-FT      | 459                            | 458        | 1      | 454        | 5      | 382        | 77     | 446        | 13     | 352        | 107    |
| QTOF        | 230                            | 223        | 7      | 227        | 3      | 204        | 26     | 221        | 9      | 210        | 20     |
| ABI-4700    | 255                            | 234        | 21     | 243        | 12     | 244        | 11     | 243        | 12     | 212        | 43     |
| TOTAL       | 2046                           | 2003       | 43     | 1997       | 49     | 1795       | 251    | 1984       | 62     | 1591       | 455    |

Supplementary Table 1B: Comparison of high-confidence peptides in Yeast dataset

| Dataset | High<br>Confidence<br>peptides | MassWiz    |        | Mascot     |        | Sequest    |        | OMSSA      |        | X!Tandem   |        |
|---------|--------------------------------|------------|--------|------------|--------|------------|--------|------------|--------|------------|--------|
|         |                                | Identified | Missed |
| YEAST   | 813                            | 795        | 18     | 763        | 50     | 672        | 141    | 806        | 7      | 592        | 221    |

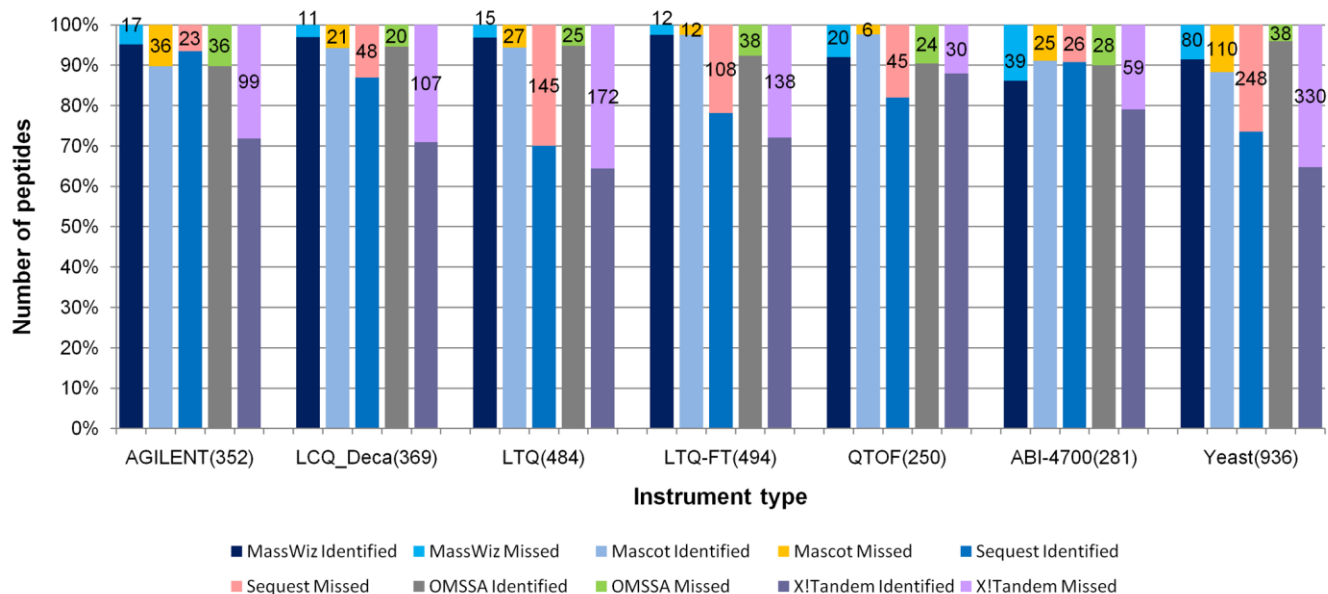

Supplementary Figure 1: Comparison of peptides identified by two or more algorithms. MassWiz, Mascot, Sequest, OMSSA and X!Tandem are compared for standard mixture on different instruments (first six data series) and mid-log phase Yeast data (last series) at 1% FDR.

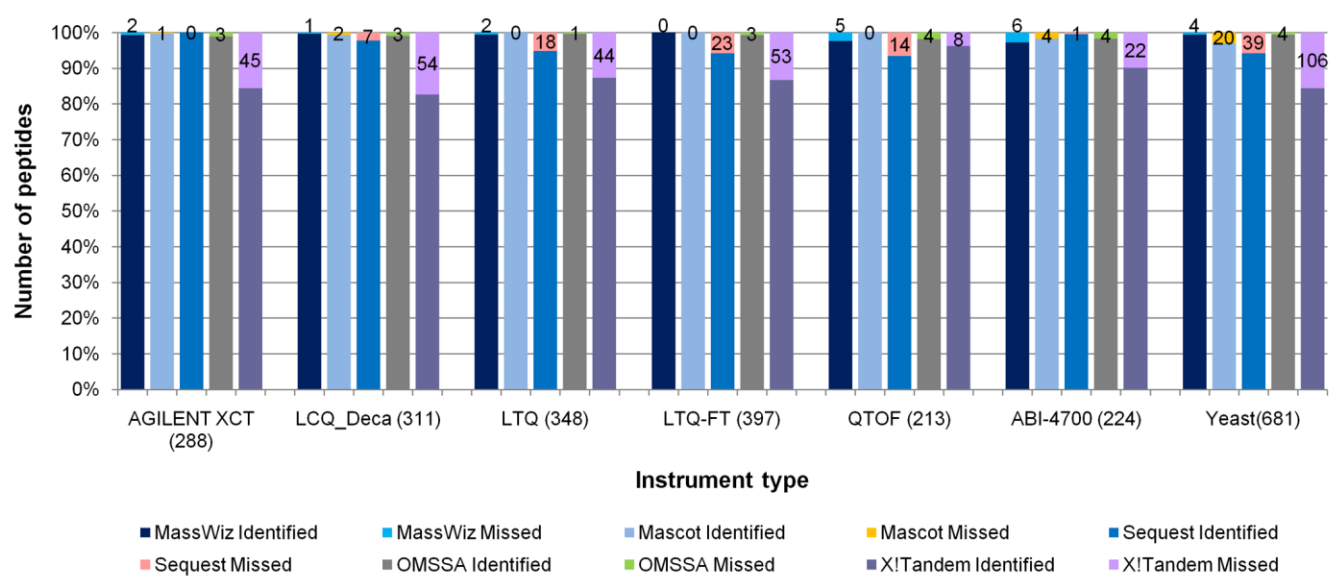

Supplementary Figure 2: Comparison of peptides identified by four or more algorithms. MassWiz, Mascot, Sequest, OMSSA and X!Tandem are compared for standard mixture on different instruments (first six data series) and mid-log phase Yeast data (last series) at 1% FDR.
